# Supplementary material for: An analysis of DNA methylation in human adipose tissue reveals differential modification of obesity genes before and after gastric bypass and weight loss
Source: PubMed Central journal article supplement (PMC4301800; doi:10.1186/s13059-014-0569-x), 2015-01-22

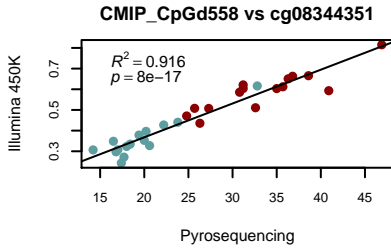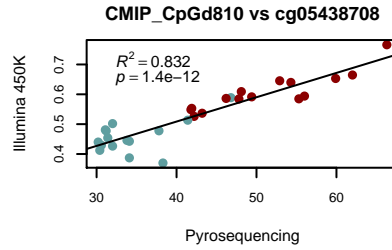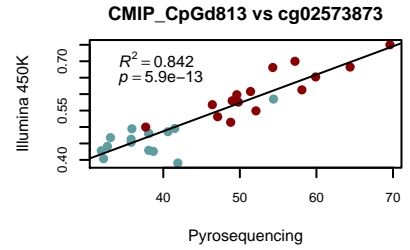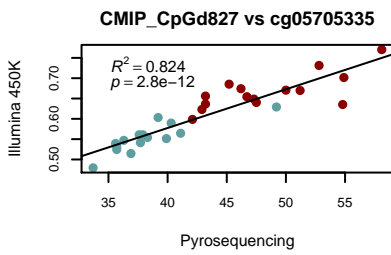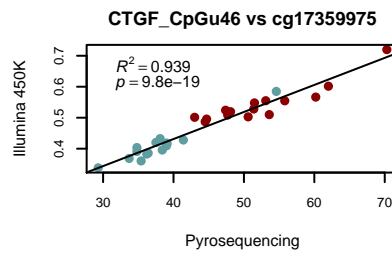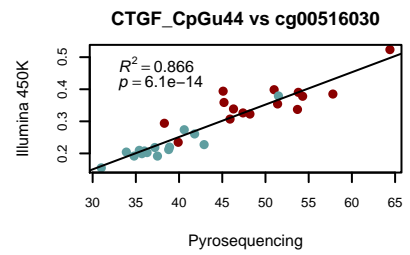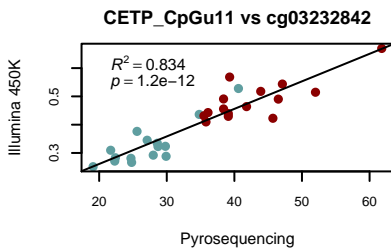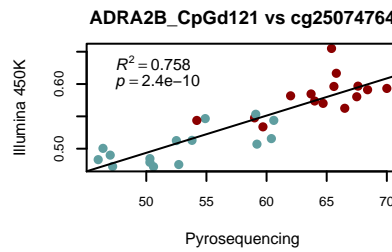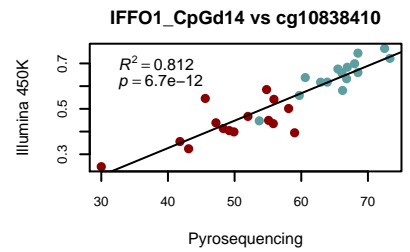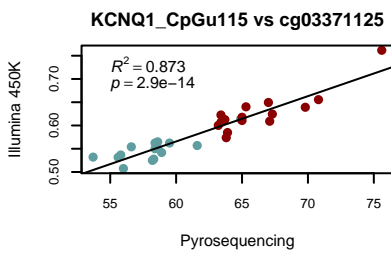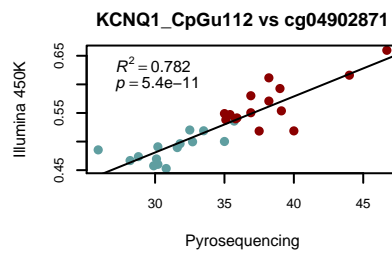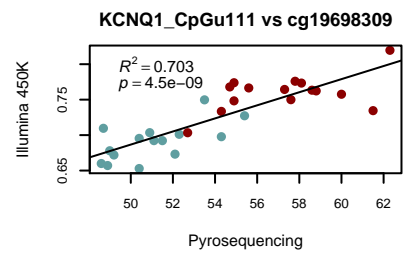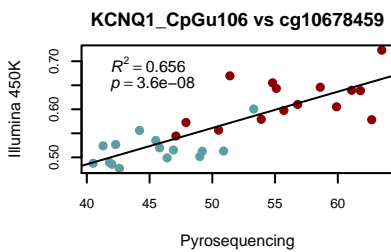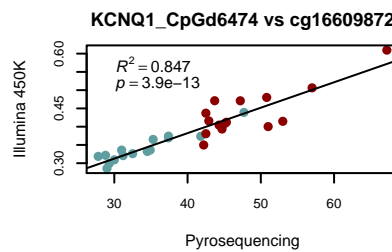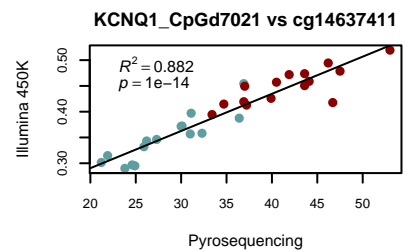

Supplement: 13059_2014_569_MOESM5_ESM.pdf [file 13059_2014_569_MOESM5_ESM.pdf]
